# Supplementary material for: The destructive subterranean termite Reticulitermes flavipes (Blattodea: Rhinotermitidae) can colonize arid territories
Source: PeerJ. 2024 Feb 29;12:e16936. doi: 10.7717/peerj.16936 (PMC10909367; doi:10.7717/peerj.16936)
Supplement: Supplemental Information 3 — Station, Island, location, month, year, season, temp_media, temp_max, temp_min, hum_media, prec. [file peerj-12-16936-s003.xlsx]

## Sheet: Hoja1
station	Island	location	month	year	season	temp_media	temp_max	temp_min	hum_media	prec
TF-105	Tenerife	NT	ene	2015	winter	14.73	18.67	11.85	69.38	11.8
TF-105	Tenerife	NT	feb	2015	winter	13.93	18.12	10.79	77	30
TF-105	Tenerife	NT	mar	2015	spring	14.8	26.55	10.45	75.23	68
TF-105	Tenerife	NT	abr	2015	spring	15.62	21.53	11.72	75.04	9.8
TF-105	Tenerife	NT	may	2015	spring	17.84	26.64	12.99	75.61	2
TF-105	Tenerife	NT	jun	2015	summer	18.4	22.6	14.59	77.8	8.6
TF-105	Tenerife	NT	jul	2015	summer	20.84	30.84	17.33	81.03	2.8
TF-105	Tenerife	NT	ago	2015	summer	21.95	31.63	18.33	77.06	55.8
TF-105	Tenerife	NT	sep	2015	autumn	22.15	28.07	18	75.53	12.2
TF-105	Tenerife	NT	oct	2015	autumn	20.88	30.78	14.66	76.55	222.6
TF-105	Tenerife	NT	nov	2015	autumn	19.33	27.55	14.72	65.77	7.8
TF-105	Tenerife	NT	dic	2015	winter	18.76	25.68	13.59	49.11	10.4
TF-105	Tenerife	NT	ene	2016	winter	17.51	26.08	13.05	63.81	12.8
TF-105	Tenerife	NT	feb	2016	winter	15.31	22.53	8.23	75.67	140
TF-105	Tenerife	NT	mar	2016	spring	15.22	23.81	11.52	71.25	42.8
TF-105	Tenerife	NT	abr	2016	spring	16.13	21.6	12.78	75.8	64
TF-105	Tenerife	NT	may	2016	spring	16.89	21.39	13.45	76.57	43.2
TF-105	Tenerife	NT	jun	2016	summer	19.15	23.67	14.8	78.39	8.8
TF-105	Tenerife	NT	jul	2016	summer	19.87	28.14	16.27	80.64	20.6
TF-105	Tenerife	NT	ago	2016	summer	21.54	38.12	17.4	77.74	0.2
TF-105	Tenerife	NT	sep	2016	autumn	20.62	25.28	17	77.44	2.8
TF-105	Tenerife	NT	oct	2016	autumn	19.91	26.51	15.6	76	32.6
TF-105	Tenerife	NT	nov	2016	autumn	17.8	23.61	12.78	73.88	88.4
TF-105	Tenerife	NT	dic	2016	winter	16.99	24.08	12.25	67.23	35.2
TF-105	Tenerife	NT	ene	2017	winter	15.9	23.35	10.16	63.54	49
TF-105	Tenerife	NT	feb	2017	winter	14.99	20.46	11.59	76.37	56.6
TF-105	Tenerife	NT	mar	2017	spring	16.34	31.56	10.38	68.23	39.8
TF-105	Tenerife	NT	abr	2017	spring	18	32.96	12.78	70.34	10.2
TF-105	Tenerife	NT	may	2017	spring	18.14	24.48	14.06	74.55	24.6
TF-105	Tenerife	NT	jun	2017	summer	19.17	29.1	14.24	76.21	3.6
TF-105	Tenerife	NT	jul	2017	summer	19.1	35.58	13.11	77.9	12.6
TF-105	Tenerife	NT	ago	2017	summer	20.86	27.7	13.84	81.43	16.6
TF-105	Tenerife	NT	sep	2017	autumn	19.88	28.55	14.92	78.74	9.8
TF-105	Tenerife	NT	oct	2017	autumn	21.09	33.23	15.53	67.35	13.2
TF-105	Tenerife	NT	nov	2017	autumn	19.41	28.16	14.39	66.32	25.4
TF-105	Tenerife	NT	dic	2017	winter	15.87	22.94	9.77	68.46	42.2
TF-105	Tenerife	NT	ene	2018	winter	14.46	24.34	9.3	71.88	51.6
TF-105	Tenerife	NT	feb	2018	winter	13.56	21.66	9.09	71.64	65.8
TF-105	Tenerife	NT	mar	2018	spring	15.32	25.3	10.17	75.42	33
TF-105	Tenerife	NT	abr	2018	spring	14.74	20.34	10.24	77.1	57.8
TF-105	Tenerife	NT	may	2018	spring	15.98	20.72	10.51	75.46	24.61
TF-105	Tenerife	NT	jun	2018	summer	18.26	24.21	14.66	78.87	13.47
TF-105	Tenerife	NT	jul	2018	summer	19.76	24.01	16.26	80.51	0.4
TF-105	Tenerife	NT	ago	2018	summer	20.9	29.1	17.87	80.68	6.14
TF-105	Tenerife	NT	sep	2018	autumn	21.34	30.22	17.74	79.56	1.39
TF-105	Tenerife	NT	oct	2018	autumn	19.94	26.96	14.53	78.67	82.37
TF-105	Tenerife	NT	nov	2018	autumn	17.29	22.81	11.79	76.82	126.32
TF-105	Tenerife	NT	dic	2018	winter	17.94	25.42	12.43	56.57	21.98
TF-105	Tenerife	NT	ene	2019	winter	15.45	23.48	11.08	64.82	34.02
TF-105	Tenerife	NT	feb	2019	winter	17.29	27.43	11.06	51.34	38.62
TF-105	Tenerife	NT	mar	2019	spring	15.64	23.27	11.79	74.7	58.81
TF-105	Tenerife	NT	abr	2019	spring	15.96	21.14	11.31	75.64	41.58
TF-105	Tenerife	NT	may	2019	spring	17.69	24.08	14.53	77.05	4.95
TF-105	Tenerife	NT	jun	2019	summer	19.17	25.28	14.39	76.28	30.1
TF-105	Tenerife	NT	jul	2019	summer	20.04	24.54	16.47	78.89	11.48
TF-105	Tenerife	NT	ago	2019	summer	21.16	28.28	17.59	80.62	4.16
TF-105	Tenerife	NT	sep	2019	autumn	20.93	29.59	17.53	77.14	2.97
TF-105	Tenerife	NT	oct	2019	autumn	20.52	34.99	14.73	73.07	41.58
TF-105	Tenerife	NT	nov	2019	autumn	18.31	25.68	14.33	76.94	41.58
TF-105	Tenerife	NT	dic	2019	winter	17.54	26.35	12.78	64.84	39.6
TF-105	Tenerife	NT	ene	2020	winter	16.09	27.29	10.99	59.48	7.72
TF-105	Tenerife	NT	feb	2020	winter	18.68	27.83	11.91	54.68	3.76
TF-105	Tenerife	NT	mar	2020	spring	16.07	25.82	11.45	73.74	56.23
TF-105	Tenerife	NT	abr	2020	spring	17.25	22.94	13.06	75.35	51.09
TF-105	Tenerife	NT	may	2020	spring	18.32	26.08	13.05	75.67	20
TF-105	Tenerife	NT	jun	2020	summer	20.47	29.04	16	73.57	7.33
TF-105	Tenerife	NT	jul	2020	summer	20.54	28.49	17.81	79.49	0.59
TF-105	Tenerife	NT	ago	2020	summer	21.49	31.31	17.08	79.15	4.36
TF-105	Tenerife	NT	sep	2020	autumn	21.95	31.44	17.28	76.45	5.15
TF-105	Tenerife	NT	oct	2020	autumn	20.98	33.04	16.27	70.03	63.37
TF-105	Tenerife	NT	nov	2020	autumn	19.5	30.15	13.15	65.64	85.54
TF-105	Tenerife	NT	dic	2020	winter	16.68	21.6	12.75	74.66	47.78
TF-105	Tenerife	NT	ene	2021	winter	15.8	24.31	10.16	72.78	49.25
TF-105	Tenerife	NT	feb	2021	winter	15.55	24.64	7.25	70.46	111.56
TF-105	Tenerife	NT	mar	2021	spring	15.96	26.94	12.28	72.32	34.56
TF-105	Tenerife	NT	abr	2021	spring	17.56	24.95	12.88	72.37	33.36
TF-105	Tenerife	NT	may	2021	spring	17.76	23.02	14.25	74.17	8.64
TF-105	Tenerife	NT	jun	2021	summer	18.46	22.58	14.91	74.25	0.8
TF-106	Tenerife	NT	ene	2015	winter	16.01	20.46	11.8	62.27	32.4
TF-106	Tenerife	NT	feb	2015	winter	15.3	19.38	10.38	69.68	37.2
TF-106	Tenerife	NT	mar	2015	spring	15.85	24.84	9.16	69.77	66.2
TF-106	Tenerife	NT	abr	2015	spring	16.76	21.91	11.26	68.46	5.8
TF-106	Tenerife	NT	may	2015	spring	18.93	25.96	12.37	69.87	0.8
TF-106	Tenerife	NT	jun	2015	summer	19.92	24.41	15.02	68.86	3.4
TF-106	Tenerife	NT	jul	2015	summer	22.08	27.68	17.15	74.69	1.8
TF-106	Tenerife	NT	ago	2015	summer	23.12	30.68	18.91	71.17	44
TF-106	Tenerife	NT	sep	2015	autumn	23.12	29.06	17.52	70.58	1.2
TF-106	Tenerife	NT	oct	2015	autumn	21.92	29.6	15.9	71.43	189.4
TF-106	Tenerife	NT	nov	2015	autumn	20.14	29.47	14.76	62.33	7
TF-106	Tenerife	NT	dic	2015	winter	19.16	27.21	12	48.02	3.4
TF-106	Tenerife	NT	ene	2016	winter	18.03	28.35	11.66	61.55	11.8
TF-106	Tenerife	NT	feb	2016	winter	16.49	24.17	9.57	68.7	101.6
TF-106	Tenerife	NT	mar	2016	spring	16.35	25.08	10.68	64.83	35.6
TF-106	Tenerife	NT	abr	2016	spring	17.36	23.53	12.87	68.81	50.2
TF-106	Tenerife	NT	may	2016	spring	18.43	23.19	13.27	67.69	28.2
TF-106	Tenerife	NT	jun	2016	summer	20.46	24.64	14.35	70.55	5.2
TF-106	Tenerife	NT	jul	2016	summer	21.01	27.51	16.47	74.31	17.4
TF-106	Tenerife	NT	ago	2016	summer	24.08	34.46	18.97	65.81	0
TF-106	Tenerife	NT	sep	2016	autumn	22.09	25.76	18.4	68.88	1
TF-106	Tenerife	NT	oct	2016	autumn	21.21	27.48	15.5	69.72	30.8
TF-106	Tenerife	NT	nov	2016	autumn	19.06	25.42	13.68	68.28	65.8
TF-106	Tenerife	NT	dic	2016	winter	18.06	25.62	13.04	61.54	22.8
TF-106	Tenerife	NT	ene	2017	winter	17.09	24.54	11.6	57.54	27.6
TF-106	Tenerife	NT	feb	2017	winter	16.47	21.5	11.12	68.96	41.2
TF-106	Tenerife	NT	mar	2017	spring	17.46	34.63	10.95	63.85	42
TF-106	Tenerife	NT	abr	2017	spring	19.16	28.02	12.88	66.21	5
TF-106	Tenerife	NT	may	2017	spring	20.05	24.57	14.73	65.7	9
TF-106	Tenerife	NT	jun	2017	summer	21.3	28.62	16.17	67.98	0.4
TF-106	Tenerife	NT	jul	2017	summer	21.88	37.33	17.45	68.87	0
TF-106	Tenerife	NT	ago	2017	summer	22.78	28.02	16.44	73.32	0
TF-106	Tenerife	NT	sep	2017	autumn	22.41	29.97	18.4	70.68	0
TF-106	Tenerife	NT	oct	2017	autumn	22.48	35.51	16.01	63.9	0
TF-106	Tenerife	NT	nov	2017	autumn	20.65	29.81	14.4	62.19	0
TF-106	Tenerife	NT	dic	2017	winter	17.72	24.27	12.77	59.6	33.8
TF-106	Tenerife	NT	ene	2018	winter	16.4	24.47	11.08	66.79	41.4
TF-106	Tenerife	NT	feb	2018	winter	15.8	23.49	9.97	63.87	43
TF-106	Tenerife	NT	mar	2018	spring	17.5	25.22	11.9	67.77	19.4
TF-106	Tenerife	NT	abr	2018	spring	17.28	22.18	12.64	66.88	39.6
TF-106	Tenerife	NT	may	2018	spring	18.05	22.48	13.55	64.48	11.6
TF-106	Tenerife	NT	jun	2018	summer	19.71	24.81	15.22	68.49	10
TF-106	Tenerife	NT	jul	2018	summer	21.26	24.88	17.11	69.35	0
TF-106	Tenerife	NT	ago	2018	summer	22.27	26.46	18.16	70.4	4
TF-106	Tenerife	NT	sep	2018	autumn	22.61	30.89	17.55	70.11	0.8
TF-106	Tenerife	NT	oct	2018	autumn	21.12	28.39	15.87	70.34	57.4
TF-106	Tenerife	NT	nov	2018	autumn	18.38	23.56	12.47	69.27	91.4
TF-106	Tenerife	NT	dic	2018	winter	18.18	25.72	10.04	55.69	0
TF-106	Tenerife	NT	ene	2019	winter	16.51	25.11	10.85	59.43	25.4
TF-106	Tenerife	NT	feb	2019	winter	17.79	27.88	10.24	49.37	30.4
TF-106	Tenerife	NT	mar	2019	spring	16.95	24.03	12.1	65.91	50.2
TF-106	Tenerife	NT	abr	2019	spring	17.35	22.35	12.1	66.75	50.4
TF-106	Tenerife	NT	may	2019	spring	19.14	22.75	15.19	66.72	2.4
TF-106	Tenerife	NT	jun	2019	summer	20.47	27.07	14.33	67.45	16.6
TF-106	Tenerife	NT	jul	2019	summer	21.56	25.72	15.88	68.49	6
TF-106	Tenerife	NT	ago	2019	summer	22.5	26.97	18.2	70.94	2.4
TF-106	Tenerife	NT	sep	2019	autumn	22.24	27.24	17.29	68.05	0.6
TF-106	Tenerife	NT	oct	2019	autumn	21.31	28.42	15.07	67.82	31.4
TF-106	Tenerife	NT	nov	2019	autumn	19.54	27.27	14.56	69.9	31.8
TF-106	Tenerife	NT	dic	2019	winter	18.48	27.71	12.78	59.25	32.6
TF-106	Tenerife	NT	ene	2020	winter	17	26.77	10.55	54.8	6.6
TF-106	Tenerife	NT	feb	2020	winter	19.4	30.38	10.89	51.54	2.6
TF-106	Tenerife	NT	mar	2020	spring	17.08	27.11	11.39	68.14	42.6
TF-106	Tenerife	NT	abr	2020	spring	18.57	24.34	12.54	66.77	39
TF-106	Tenerife	NT	may	2020	spring	19.57	25.49	14.26	67.48	6.2
TF-106	Tenerife	NT	jun	2020	summer	21.7	29.33	16.42	65.68	3.6
TF-106	Tenerife	NT	jul	2020	summer	21.96	27.21	18.57	69.93	0
TF-106	Tenerife	NT	ago	2020	summer	22.72	28.83	17.39	71.26	2.2
TF-106	Tenerife	NT	sep	2020	autumn	22.79	31.86	17.73	71.18	3.8
TF-106	Tenerife	NT	oct	2020	autumn	21.99	30.92	16.08	64.18	35.8
TF-106	Tenerife	NT	nov	2020	autumn	20.34	31.12	14.01	61.87	106.8
TF-106	Tenerife	NT	dic	2020	winter	17.69	23.43	12.57	68.84	37.6
TF-106	Tenerife	NT	ene	2021	winter	16.54	23.73	10.99	69.22	54.6
TF-106	Tenerife	NT	feb	2021	winter	16.4	26.73	10.51	65.97	87.81
TF-106	Tenerife	NT	mar	2021	spring	17.06	28.89	11.73	66.17	25.4
TF-106	Tenerife	NT	abr	2021	spring	18.69	24.64	13.15	65.47	15
TF-106	Tenerife	NT	may	2021	spring	19.22	24.27	13.99	65.02	5.2
TF-106	Tenerife	NT	jun	2021	summer	19.79	23.53	16.07	65.44	0.2
TF-108	Tenerife	NT	ene	2015	winter	14.79	19.18	10.04	69.3	40
TF-108	Tenerife	NT	feb	2015	winter	14.06	18.8	8.84	77.49	48.6
TF-108	Tenerife	NT	mar	2015	spring	14.83	27.1	6.25	74.69	58.8
TF-108	Tenerife	NT	abr	2015	spring	15.81	22.41	9.67	74.37	6.8
TF-108	Tenerife	NT	may	2015	spring	18.04	27.85	10.52	74.51	1.6
TF-108	Tenerife	NT	jun	2015	summer	18.76	23.61	14.05	75.98	5.2
TF-108	Tenerife	NT	jul	2015	summer	21.1	29.05	15.8	80.58	1
TF-108	Tenerife	NT	ago	2015	summer	22.24	32.34	17.92	76.58	46.4
TF-108	Tenerife	NT	sep	2015	autumn	22.31	28.51	16.86	75.55	6.4
TF-108	Tenerife	NT	oct	2015	autumn	21.06	32.39	14.6	77	211.6
TF-108	Tenerife	NT	nov	2015	autumn	19.18	27.58	13.3	67.59	6.8
TF-108	Tenerife	NT	dic	2015	winter	18.51	26.11	11.76	52.49	9
TF-108	Tenerife	NT	ene	2016	winter	17.21	27.03	10.69	64.92	11.2
TF-108	Tenerife	NT	feb	2016	winter	15.48	23.06	8.6	74.52	102.2
TF-108	Tenerife	NT	mar	2016	spring	15.27	22.33	9.87	71.33	37.2
TF-108	Tenerife	NT	abr	2016	spring	16.21	22.92	11.34	76.66	53.8
TF-108	Tenerife	NT	may	2016	spring	17.26	22.2	11.89	75.65	41.4
TF-108	Tenerife	NT	jun	2016	summer	19.35	24.19	12.99	78.1	7.2
TF-108	Tenerife	NT	jul	2016	summer	20.09	27.65	14.53	80.66	20.8
TF-108	Tenerife	NT	ago	2016	summer	21.9	39.25	16.08	77	0.4
TF-108	Tenerife	NT	sep	2016	autumn	21.25	25.52	16.55	75.53	1.6
TF-108	Tenerife	NT	oct	2016	autumn	20.26	27.07	15.14	75.49	36.8
TF-108	Tenerife	NT	nov	2016	autumn	17.85	24.26	11.62	75.05	75.2
TF-108	Tenerife	NT	dic	2016	winter	17.04	24.05	11.82	68.11	25.6
TF-108	Tenerife	NT	ene	2017	winter	16.08	22.65	10.11	63.49	32.4
TF-108	Tenerife	NT	feb	2017	winter	15.36	24.01	9.77	76.81	47.8
TF-108	Tenerife	NT	mar	2017	spring	16.58	32.79	9.32	68.14	42.6
TF-108	Tenerife	NT	abr	2017	spring	18.59	34.57	11.07	69.86	8
TF-108	Tenerife	NT	may	2017	spring	19.01	25.46	13.02	72.72	19.8
TF-108	Tenerife	NT	jun	2017	summer	20.37	28.37	14.7	74.83	1.4
TF-108	Tenerife	NT	jul	2017	summer	20.89	37.74	15.73	76.42	14
TF-108	Tenerife	NT	ago	2017	summer	21.88	33.76	15.49	79.98	11.2
TF-108	Tenerife	NT	sep	2017	autumn	21.53	30.71	16.83	77.65	10
TF-108	Tenerife	NT	oct	2017	autumn	21.91	34.45	14.05	65.37	10.2
TF-108	Tenerife	NT	nov	2017	autumn	19.94	30.33	13.4	66.39	9.2
TF-108	Tenerife	NT	dic	2017	winter	16.57	23.16	10.8	67.36	37
TF-108	Tenerife	NT	ene	2018	winter	15.48	25.83	9.91	65.96	50
TF-108	Tenerife	NT	feb	2018	winter	14.6	21.82	9.13	68.37	57
TF-108	Tenerife	NT	mar	2018	spring	16.5	24.53	10.83	72.4	24
TF-108	Tenerife	NT	abr	2018	spring	16.16	21.69	11.21	70.37	42.8
TF-108	Tenerife	NT	may	2018	spring	16.97	21.58	13.26	65	11.8
TF-108	Tenerife	NT	jun	2018	summer	18.67	24.57	13.44	72.57	13
TF-108	Tenerife	NT	jul	2018	summer	20.17	24.95	15.22	78.5	0
TF-108	Tenerife	NT	ago	2018	summer	21.27	30.47	16.21	74.87	4.6
TF-108	Tenerife	NT	sep	2018	autumn	21.72	30.44	16.25	74.16	0.4
TF-108	Tenerife	NT	oct	2018	autumn	20.07	27.73	14.33	75.22	67.6
TF-108	Tenerife	NT	nov	2018	autumn	17.25	22.58	11.62	73.7	113.8
TF-108	Tenerife	NT	dic	2018	winter	17.27	25.39	10.23	61.73	0
TF-108	Tenerife	NT	ene	2019	winter	15.36	23.23	9.89	67.7	28.8
TF-108	Tenerife	NT	feb	2019	winter	17.01	28.1	9.13	49.56	28.4
TF-108	Tenerife	NT	mar	2019	spring	15.83	25.08	8.89	65.91	44.4
TF-108	Tenerife	NT	abr	2019	spring	16.22	21.97	10.88	68.58	40
TF-108	Tenerife	NT	may	2019	spring	18.12	24.54	12.97	69.33	2.8
TF-108	Tenerife	NT	jun	2019	summer	19.46	26.63	12.94	75.62	24.4
TF-108	Tenerife	NT	jul	2019	summer	20.45	24.85	14.58	77.25	8.8
TF-108	Tenerife	NT	ago	2019	summer	21.56	28.48	16.39	75.82	2.2
TF-108	Tenerife	NT	sep	2019	autumn	21.32	30.09	15.5	69.61	0.8
TF-108	Tenerife	NT	oct	2019	autumn	20.69	37.24	14.21	70.48	31.2
TF-108	Tenerife	NT	nov	2019	autumn	18.48	26.67	13.39	71.3	39.79
TF-108	Tenerife	NT	dic	2019	winter	17.34	27.39	12.01	56.96	39.4
TF-108	Tenerife	NT	ene	2020	winter	16.07	27.63	9.1	41.6	9.8
TF-108	Tenerife	NT	feb	2020	winter	18.64	28.52	9.34	44.43	2.8
TF-108	Tenerife	NT	mar	2020	spring	16.28	27.35	10.3	59.95	53.2
TF-108	Tenerife	NT	abr	2020	spring	17.52	23.34	11.77	66.23	32.8
TF-108	Tenerife	NT	may	2020	spring	18.62	26.8	11.64	67.68	4.8
TF-108	Tenerife	NT	jun	2020	summer	20.74	28.79	14.89	65.86	5.6
TF-108	Tenerife	NT	jul	2020	summer	20.86	26.6	16.53	76.53	0
TF-108	Tenerife	NT	ago	2020	summer	21.79	30.85	15.34	78.15	2.6
TF-108	Tenerife	NT	sep	2020	autumn	22.11	31.77	15.75	77.86	2.4
TF-108	Tenerife	NT	oct	2020	autumn	21.09	33.8	14.86	69.05	40.2
TF-108	Tenerife	NT	nov	2020	autumn	19.41	30.78	13.11	64.24	98.4
TF-108	Tenerife	NT	dic	2020	winter	16.64	21.94	11.09	74.27	56.4
TF-108	Tenerife	NT	ene	2021	winter	15.43	25.09	9.82	71.87	58.4
TF-108	Tenerife	NT	feb	2021	winter	15.38	25.53	8.87	71.79	81.8
TF-108	Tenerife	NT	mar	2021	spring	16.12	27.25	10.06	74.55	30.2
TF-108	Tenerife	NT	abr	2021	spring	17.7	24.88	11.36	57.17	28.2
TF-108	Tenerife	NT	may	2021	spring	18.07	23.44	12.32	62.38	6.4
TF-108	Tenerife	NT	jun	2021	summer	18.66	22.42	15.31	75.89	0
TF-109	Tenerife	NT	ene	2015	winter	12.82	17.11	8.93	74.77	45.8
TF-109	Tenerife	NT	feb	2015	winter	12.02	17.41	8.05	84.31	75.8
TF-109	Tenerife	NT	mar	2015	spring	13.39	25.63	7.94	77.71	85
TF-109	Tenerife	NT	abr	2015	spring	14.06	21.64	8.66	80.35	13.2
TF-109	Tenerife	NT	may	2015	spring	17	28.36	11.15	75.23	5
TF-109	Tenerife	NT	jun	2015	summer	17.17	24.1	11.7	82.19	11.2
TF-109	Tenerife	NT	jul	2015	summer	20.15	32.23	15.07	80.49	4.4
TF-109	Tenerife	NT	ago	2015	summer	20.72	30.86	16.02	80.18	57.6
TF-109	Tenerife	NT	sep	2015	autumn	20.86	28.68	15.52	77.81	13.2
TF-109	Tenerife	NT	oct	2015	autumn	19.36	31.92	12.82	80.06	214
TF-109	Tenerife	NT	nov	2015	autumn	17.53	26.49	12.55	69.51	10.2
TF-109	Tenerife	NT	dic	2015	winter	16.8	24.61	10.78	50.88	12.4
TF-109	Tenerife	NT	ene	2016	winter	15.78	24.81	10.37	63.62	12.8
TF-109	Tenerife	NT	feb	2016	winter	13.57	21.33	6.37	79.99	145.6
TF-109	Tenerife	NT	mar	2016	spring	13.45	22.63	8.87	76.33	42.6
TF-109	Tenerife	NT	abr	2016	spring	14.49	21.81	10.44	81.24	75.8
TF-109	Tenerife	NT	may	2016	spring	15.23	21.27	11.15	82.21	58.6
TF-109	Tenerife	NT	jun	2016	summer	17.84	24.68	11.83	82.53	13.2
TF-109	Tenerife	NT	jul	2016	summer	19.11	30.42	12.45	79.24	24
TF-109	Tenerife	NT	ago	2016	summer	21.28	37.21	15.96	71.06	1.8
TF-109	Tenerife	NT	sep	2016	autumn	19.48	25.27	14.77	77.3	6.2
TF-109	Tenerife	NT	oct	2016	autumn	18.67	26.8	13.61	73.56	39.6
TF-109	Tenerife	NT	nov	2016	autumn	16.63	22.2	12.35	74.18	64
TF-109	Tenerife	NT	dic	2016	winter	14.42	21.16	10.95	67.3	33.6
TF-109	Tenerife	NT	ene	2017	winter	14.17	21.81	9.96	60.82	47.4
TF-109	Tenerife	NT	feb	2017	winter	13.47	22.15	8.73	75.76	63
TF-109	Tenerife	NT	mar	2017	spring	15.19	30.38	8.42	63.21	43.2
TF-109	Tenerife	NT	abr	2017	spring	17.29	32.53	11.08	62.42	9
TF-109	Tenerife	NT	may	2017	spring	17.4	24.78	11.66	67.63	32
TF-109	Tenerife	NT	jun	2017	summer	19.11	32.4	13.81	66.14	5.2
TF-109	Tenerife	NT	jul	2017	summer	19.63	35.94	14.05	63.88	16.4
TF-109	Tenerife	NT	ago	2017	summer	21.04	32.26	15.69	65.6	19.4
TF-109	Tenerife	NT	sep	2017	autumn	20	29.67	15.35	69.97	11.6
TF-109	Tenerife	NT	oct	2017	autumn	20.74	33.25	13.81	55.29	14.2
TF-109	Tenerife	NT	nov	2017	autumn	18.54	30.28	12.52	57.66	8.8
TF-109	Tenerife	NT	dic	2017	winter	14.66	22.43	9.96	53.63	45.4
TF-109	Tenerife	NT	ene	2018	winter	13.78	23.89	7.81	64.85	58
TF-109	Tenerife	NT	feb	2018	winter	12.57	20.65	8.39	68.41	73.2
TF-109	Tenerife	NT	mar	2018	spring	14.65	24.74	9.99	69.19	39.6
TF-109	Tenerife	NT	abr	2018	spring	14.01	20.51	10.03	74.12	69.8
TF-109	Tenerife	NT	may	2018	spring	14.94	22.53	10.78	70.15	25.6
TF-109	Tenerife	NT	jun	2018	summer	17.19	26.43	12.5	69.16	26
TF-109	Tenerife	NT	jul	2018	summer	18.77	26.33	14.19	63.1	0.8
TF-109	Tenerife	NT	ago	2018	summer	20.23	29.02	16.02	51.49	7.6
TF-109	Tenerife	NT	sep	2018	autumn	20.38	31	15.75	49.17	1.4
TF-109	Tenerife	NT	oct	2018	autumn	18.39	26.94	13.27	47.96	94.6
TF-109	Tenerife	NT	nov	2018	autumn	15.52	20.97	10.23	51.58	154.8
TF-109	Tenerife	NT	dic	2018	winter	16.1	24.1	9.82	53.8	1.4
TF-109	Tenerife	NT	ene	2019	winter	13.44	22.02	8.63	64.57	35.8
TF-109	Tenerife	NT	feb	2019	winter	15.46	27.01	8.8	50.19	45.6
TF-109	Tenerife	NT	mar	2019	spring	13.97	22.97	8.9	74.72	80.6
TF-109	Tenerife	NT	abr	2019	spring	14.32	20.89	9.75	75.65	49
TF-109	Tenerife	NT	may	2019	spring	16.58	24.21	12.14	73.85	7
TF-109	Tenerife	NT	jun	2019	summer	18.38	27.18	11.63	67.87	39.8
TF-109	Tenerife	NT	jul	2019	summer	18.86	25.1	14.29	72.08	16.6
TF-109	Tenerife	NT	ago	2019	summer	20.54	31.95	15.18	67.01	4.8
TF-109	Tenerife	NT	sep	2019	autumn	19.73	28.82	15.08	66.11	2
TF-109	Tenerife	NT	oct	2019	autumn	19.61	35.62	13.34	56.9	45
TF-109	Tenerife	NT	nov	2019	autumn	16.64	24.82	12.35	66.52	50.6
TF-109	Tenerife	NT	dic	2019	winter	15.59	25.37	10.91	50.73	41.6
TF-109	Tenerife	NT	ene	2020	winter	14.28	26.84	8.1	44.97	8.8
TF-109	Tenerife	NT	feb	2020	winter	17.08	26.94	8.68	44.7	13
TF-109	Tenerife	NT	mar	2020	spring	14.84	25.78	9.92	62.18	64.8
TF-109	Tenerife	NT	abr	2020	spring	15.68	22.5	10.58	65.42	54
TF-109	Tenerife	NT	may	2020	spring	17.44	29.29	11.97	58.93	11
TF-109	Tenerife	NT	jun	2020	summer	19.19	30.96	13.4	55.86	13.2
TF-109	Tenerife	NT	jul	2020	summer	19.62	29.98	14.94	55.46	1.2
TF-109	Tenerife	NT	ago	2020	summer	20.86	35.88	15.55	54.22	8.6
TF-109	Tenerife	NT	sep	2020	autumn	21.13	32.92	15.15	51.51	5.8
TF-109	Tenerife	NT	oct	2020	autumn	19.41	32.13	14.56	50.66	68.6
TF-109	Tenerife	NT	nov	2020	autumn	17.62	29.09	10.78	59.76	99.4
TF-109	Tenerife	NT	dic	2020	winter	14.53	20.05	9.91	78.67	58.2
TF-109	Tenerife	NT	ene	2021	winter	14.09	25.78	8.3	80.46	52.2
TF-109	Tenerife	NT	feb	2021	winter	13.79	23.19	7.11	80.6	102
TF-109	Tenerife	NT	mar	2021	spring	14.19	25.64	9.91	84.84	38.6
TF-109	Tenerife	NT	abr	2021	spring	15.88	24.41	9.8	85.02	42
TF-109	Tenerife	NT	may	2021	spring	16.11	22.09	11.34	86.66	7.6
TF-02	Tenerife	ST	ene	2015	winter	17.2	22.3	12.93	55.97	0
TF-02	Tenerife	ST	feb	2015	winter	16.9	22.21	12.72	62.42	2.21
TF-02	Tenerife	ST	mar	2015	spring	17.68	25.45	12.79	63.05	9.25
TF-02	Tenerife	ST	abr	2015	spring	18.2	23.34	14	64.94	0
TF-02	Tenerife	ST	may	2015	spring	20.49	32.35	15.54	70.3	0
TF-02	Tenerife	ST	jun	2015	summer	20.92	26.1	16.89	71.41	0
TF-02	Tenerife	ST	jul	2015	summer	23.59	29.82	18.37	72.43	0
TF-02	Tenerife	ST	ago	2015	summer	24.16	31.96	20.25	71.22	38.61
TF-02	Tenerife	ST	sep	2015	autumn	24.02	29.91	20.11	70.99	2.17
TF-02	Tenerife	ST	oct	2015	autumn	23.32	31.86	18.84	67.87	27.98
TF-02	Tenerife	ST	nov	2015	autumn	21.49	28.14	17.09	56.12	0
TF-02	Tenerife	ST	dic	2015	winter	20.45	28.41	15.08	43.6	12.41
TF-02	Tenerife	ST	ene	2016	winter	18.92	25.59	14.82	62.2	0
TF-02	Tenerife	ST	feb	2016	winter	17.64	24.2	10.1	65.27	53.38
TF-02	Tenerife	ST	mar	2016	spring	17.66	24.33	13.19	61.47	8.67
TF-02	Tenerife	ST	abr	2016	spring	18.7	23.29	14.48	66.54	3.15
TF-02	Tenerife	ST	may	2016	spring	19.7	25.43	15.42	63.49	3.55
TF-02	Tenerife	ST	jun	2016	summer	21.59	29.12	16.49	71.14	0
TF-02	Tenerife	ST	jul	2016	summer	23.19	32.7	18.76	69.69	0
TF-02	Tenerife	ST	ago	2016	summer	23.86	32.33	19.37	73.84	0
TF-02	Tenerife	ST	sep	2016	autumn	23.03	28.64	19.18	69.06	0
TF-02	Tenerife	ST	oct	2016	autumn	22.29	29.32	15.6	65.58	20.3
TF-02	Tenerife	ST	nov	2016	autumn	20.36	26.38	15.15	61.22	3.65
TF-02	Tenerife	ST	dic	2016	winter	19.29	26.52	14.48	55.93	10.15
TF-02	Tenerife	ST	ene	2017	winter	18.21	24.84	14	52.92	0.2
TF-02	Tenerife	ST	feb	2017	winter	17.6	25.79	13	63.74	15.43
TF-02	Tenerife	ST	mar	2017	spring	18.9	32.84	13.47	58.01	0
TF-02	Tenerife	ST	abr	2017	spring	19.97	29.94	15.02	68.54	10.76
TF-02	Tenerife	ST	may	2017	spring	21.19	27.45	16.49	64.95	0
TF-02	Tenerife	ST	jun	2017	summer	22.53	33.83	17.36	68.42	0
TF-02	Tenerife	ST	jul	2017	summer	22.99	29.85	18.17	70.79	0
TF-02	Tenerife	ST	ago	2017	summer	24.2	31.05	19.78	70.98	0
TF-02	Tenerife	ST	sep	2017	autumn	23.32	29.66	19.3	71.98	0.2
TF-02	Tenerife	ST	oct	2017	autumn	23.44	35.15	17.91	61.66	0
TF-02	Tenerife	ST	nov	2017	autumn	21.78	30.03	16.76	61.38	0
TF-02	Tenerife	ST	dic	2017	winter	18.42	24.3	13.61	58.06	5.89
TF-02	Tenerife	ST	ene	2018	winter	17.6	24.36	12.17	60.42	15.57
TF-02	Tenerife	ST	feb	2018	winter	16.74	22.62	12.19	61.62	38.41
TF-02	Tenerife	ST	mar	2018	spring	18.53	26.73	13.2	68.79	11.14
TF-02	Tenerife	ST	abr	2018	spring	18.59	25.65	14.41	65.34	1.39
TF-02	Tenerife	ST	may	2018	spring	19.02	24.51	14.95	65.32	0
TF-02	Tenerife	ST	jun	2018	summer	20.65	26.64	16.69	71.76	0
TF-02	Tenerife	ST	jul	2018	summer	22.07	28.64	18.24	73.71	0
TF-02	Tenerife	ST	ago	2018	summer	23.32	29.88	19.38	73.4	0
TF-02	Tenerife	ST	sep	2018	autumn	23.42	29.66	19.31	71.63	0.4
TF-02	Tenerife	ST	oct	2018	autumn	22.11	27.86	17.36	69.84	28.46
TF-02	Tenerife	ST	nov	2018	autumn	19.86	25.24	14.28	63.99	14.33
TF-02	Tenerife	ST	dic	2018	winter	19.53	26.86	14.55	51.32	0
TF-02	Tenerife	ST	ene	2019	winter	17.51	26.22	13.41	53.55	0
TF-02	Tenerife	ST	feb	2019	winter	18.68	29.02	12.73	48.99	2.19
TF-02	Tenerife	ST	mar	2019	spring	18.18	26.13	13.6	66.64	8.56
TF-02	Tenerife	ST	abr	2019	spring	18.6	24.17	14.14	65.1	11.94
TF-02	Tenerife	ST	may	2019	spring	20.1	26.1	15.56	69.91	0
TF-02	Tenerife	ST	jun	2019	summer	21.74	27.93	16.89	67.12	0
TF-02	Tenerife	ST	jul	2019	summer	22.79	28.67	18.71	68.74	0
TF-02	Tenerife	ST	ago	2019	summer	23.91	31.73	19.05	71.38	0
TF-02	Tenerife	ST	sep	2019	autumn	23.27	31.84	19.52	70.76	2.81
TF-02	Tenerife	ST	oct	2019	autumn	22.47	29.52	17.37	67.38	27.73
TF-02	Tenerife	ST	nov	2019	autumn	20.75	28.67	16.3	64.63	1.21
TF-02	Tenerife	ST	dic	2019	winter	19.31	28.41	14.82	57.56	7.64
TF-02	Tenerife	ST	ene	2020	winter	17.88	25.85	12.94	49	0
TF-02	Tenerife	ST	feb	2020	winter	20.13	31.84	13.68	56.53	0.2
TF-02	Tenerife	ST	mar	2020	spring	18.59	27.05	13.41	63.01	15.48
TF-02	Tenerife	ST	abr	2020	spring	19.65	24.92	15.29	65.39	0.4
TF-02	Tenerife	ST	may	2020	spring	20.97	28.66	15.83	65.13	0.2
TF-02	Tenerife	ST	jun	2020	summer	22.76	31.73	17.97	67.01	4.22
TF-02	Tenerife	ST	jul	2020	summer	23.26	30.73	19.39	74.52	0
TF-02	Tenerife	ST	ago	2020	summer	24.38	31.88	19.53	69.48	0
TF-02	Tenerife	ST	sep	2020	autumn	24.13	32.15	19.72	73.14	1.81
TF-02	Tenerife	ST	oct	2020	autumn	22.77	30.67	17.84	67.27	1.41
TF-02	Tenerife	ST	nov	2020	autumn	21.41	30.74	15.42	58.59	6.63
TF-02	Tenerife	ST	dic	2020	winter	18.96	24.67	15.36	63.39	21.1
TF-02	Tenerife	ST	ene	2021	winter	17.82	25.91	12.8	65.2	35.98
TF-02	Tenerife	ST	feb	2021	winter	17.9	25.92	12.2	59.65	6.03
TF-02	Tenerife	ST	mar	2021	spring	18.54	31.45	13.75	60.24	4.82
TF-02	Tenerife	ST	abr	2021	spring	19.95	26.86	15.49	64.45	0.4
TF-02	Tenerife	ST	may	2021	spring	20.71	27.72	16.03	62.16	0
TF-02	Tenerife	ST	jun	2021	summer	20.21	24.24	17.04	67.44	0
TF-13	Tenerife	ST	ene	2015	winter	17.07	24.45	10.46	55.32	0
TF-13	Tenerife	ST	feb	2015	winter	16.42	25.32	9.66	65.61	6.3
TF-13	Tenerife	ST	mar	2015	spring	17.43	28.25	10.51	66.13	0.6
TF-13	Tenerife	ST	abr	2015	spring	17.95	24.38	11.71	67.96	0
TF-13	Tenerife	ST	may	2015	spring	20.44	31.14	12.85	71.86	0
TF-13	Tenerife	ST	jun	2015	summer	21.02	28.42	14.57	72.15	0
TF-13	Tenerife	ST	jul	2015	summer	23.59	31.42	16.89	74.28	0
TF-13	Tenerife	ST	ago	2015	summer	24.51	35.09	17.83	71.12	15.09
TF-13	Tenerife	ST	sep	2015	autumn	24.07	34.34	17.63	73.04	2.35
TF-13	Tenerife	ST	oct	2015	autumn	23	34.01	16.96	73.78	74.28
TF-13	Tenerife	ST	nov	2015	autumn	21.38	30.63	14.05	59.23	0
TF-13	Tenerife	ST	dic	2015	winter	19.9	27.98	11.11	48.14	8.04
TF-13	Tenerife	ST	ene	2016	winter	18.43	30.76	11.12	66.24	0
TF-13	Tenerife	ST	feb	2016	winter	17.35	25.45	9.86	68.1	6.66
TF-13	Tenerife	ST	mar	2016	spring	17.42	28.26	10.32	64.17	0.98
TF-13	Tenerife	ST	abr	2016	spring	18.79	25.03	11.92	67.93	0.59
TF-13	Tenerife	ST	may	2016	spring	19.66	25.49	14.04	63.44	1.18
TF-13	Tenerife	ST	jun	2016	summer	21.72	31.09	14.11	68.21	0
TF-13	Tenerife	ST	jul	2016	summer	23.34	33.45	17.3	67.64	3.04
TF-13	Tenerife	ST	ago	2016	summer	24.18	36.48	18.57	70.45	0.41
TF-13	Tenerife	ST	sep	2016	autumn	23.02	31.48	16.24	67.11	0.41
TF-13	Tenerife	ST	oct	2016	autumn	22.04	31.08	16.24	68.34	23.55
TF-13	Tenerife	ST	nov	2016	autumn	19.95	27.57	12.85	65.27	22.33
TF-13	Tenerife	ST	dic	2016	winter	19.03	26.57	12.18	57.14	11.77
TF-13	Tenerife	ST	ene	2017	winter	17.83	26.91	10.13	54.5	0
TF-13	Tenerife	ST	feb	2017	winter	17.13	25.25	10.66	66.7	27.2
TF-13	Tenerife	ST	mar	2017	spring	18.52	34.35	10.78	60.1	5.28
TF-13	Tenerife	ST	abr	2017	spring	20.15	34.81	12.85	67.11	13.2
TF-13	Tenerife	ST	may	2017	spring	21.24	28.38	14.51	64.06	0.2
TF-13	Tenerife	ST	jun	2017	summer	22.82	35.73	15.38	65.24	0.2
TF-13	Tenerife	ST	jul	2017	summer	23.4	36.28	16.45	66.01	0.2
TF-13	Tenerife	ST	ago	2017	summer	24.42	32.09	18.3	68.57	0.41
TF-13	Tenerife	ST	sep	2017	autumn	23.68	35.35	17.64	68.32	0.61
TF-13	Tenerife	ST	oct	2017	autumn	23.58	37.65	16.04	60.23	0.2
TF-13	Tenerife	ST	nov	2017	autumn	21.2	29.56	13.85	62.22	1.62
TF-13	Tenerife	ST	dic	2017	winter	18.35	25.51	10.46	56.18	4.47
TF-13	Tenerife	ST	ene	2018	winter	16.93	29.11	10.13	63.69	1.58
TF-13	Tenerife	ST	feb	2018	winter	16.34	26.93	9.99	65.44	30.22
TF-13	Tenerife	ST	mar	2018	spring	18.54	30.76	9.86	70.68	2.54
TF-13	Tenerife	ST	abr	2018	spring	18.52	25.31	12.05	67.94	0.98
TF-13	Tenerife	ST	may	2018	spring	18.77	24.24	11.92	66.69	0
TF-13	Tenerife	ST	jun	2018	summer	20.8	27.7	14.37	70.85	0.2
TF-13	Tenerife	ST	jul	2018	summer	22.48	30.84	15.78	72.28	0
TF-13	Tenerife	ST	ago	2018	summer	23.7	32.09	17.31	72.72	0.2
TF-13	Tenerife	ST	sep	2018	autumn	23.57	32.5	17.05	71.97	0.2
TF-13	Tenerife	ST	oct	2018	autumn	22.06	29.32	14.57	72.39	16.96
TF-13	Tenerife	ST	nov	2018	autumn	19.5	26.78	12.92	68.63	12.87
TF-13	Tenerife	ST	dic	2018	winter	19.11	29.92	11.13	57.03	0
TF-13	Tenerife	ST	ene	2019	winter	16.98	24.94	9.66	56.15	0
TF-13	Tenerife	ST	feb	2019	winter	18.35	29.83	8.92	47.71	0
TF-13	Tenerife	ST	mar	2019	spring	17.62	25.3	11.11	69.4	20.08
TF-13	Tenerife	ST	abr	2019	spring	18.36	24.72	12.12	68.96	26.91
TF-13	Tenerife	ST	may	2019	spring	20.28	28.11	13.39	70.01	0.2
TF-13	Tenerife	ST	jun	2019	summer	21.44	28.16	15.24	71.04	0.2
TF-13	Tenerife	ST	jul	2019	summer	22.97	29.36	16.18	71.49	0
TF-13	Tenerife	ST	ago	2019	summer	23.93	35.56	17.31	74.64	0.2
TF-13	Tenerife	ST	sep	2019	autumn	23.08	30.03	17.11	75.05	4.42
TF-13	Tenerife	ST	oct	2019	autumn	22.15	31.03	15.17	72.37	15.48
TF-13	Tenerife	ST	nov	2019	autumn	20.34	31.89	13.45	70.95	0.4
TF-13	Tenerife	ST	dic	2019	winter	18.84	29.83	10.53	61.92	0
TF-13	Tenerife	ST	ene	2020	winter	17.05	28.97	9.19	56.31	0.6
TF-13	Tenerife	ST	feb	2020	winter	19.97	32.5	10.39	58.61	0.4
TF-13	Tenerife	ST	mar	2020	spring	18.02	33.02	11.39	70.85	8.64
TF-13	Tenerife	ST	abr	2020	spring	19.25	26.7	12.32	72.96	13.27
TF-13	Tenerife	ST	may	2020	spring	20.77	29.56	14.12	71.26	0.6
TF-13	Tenerife	ST	jun	2020	summer	22.67	29.17	16.71	72.32	8.84
TF-13	Tenerife	ST	jul	2020	summer	23.5	32.28	17.85	75.97	0.4
TF-13	Tenerife	ST	ago	2020	summer	24.23	34.55	17.38	73.91	0.2
TF-13	Tenerife	ST	sep	2020	autumn	24.2	32.75	18.43	75.41	1.81
TF-13	Tenerife	ST	oct	2020	autumn	22.7	37.23	15.51	70.9	14.88
TF-13	Tenerife	ST	nov	2020	autumn	21.24	34.22	14.19	62.1	16.08
TF-13	Tenerife	ST	dic	2020	winter	18.3	25.25	12.12	72.59	22.51
TF-13	Tenerife	ST	ene	2021	winter	17.41	29.11	9.86	72.45	24.92
TF-13	Tenerife	ST	feb	2021	winter	17.53	28.51	10.13	66.02	2.21
TF-13	Tenerife	ST	mar	2021	spring	18.09	29.84	9.26	67.55	0.6
TF-13	Tenerife	ST	abr	2021	spring	19.69	27.12	12.8	71.05	0.2
TF-13	Tenerife	ST	may	2021	spring	20.4	28.17	12.72	67.81	0.2
TF-13	Tenerife	ST	jun	2021	summer	20.16	26.3	14.66	71.67	0
Lz-airport	Lanzarote	LZ	ene	2015	winter	17.8	21.1	14.4	62	10.7
Lz-airport	Lanzarote	LZ	feb	2015	winter	17.4	20.7	14	64	11.9
Lz-airport	Lanzarote	LZ	mar	2015	spring	19	23.6	14.3	60	9.6
Lz-airport	Lanzarote	LZ	abr	2015	spring	19.7	24.2	15.2	62	0
Lz-airport	Lanzarote	LZ	may	2015	spring	23	27.9	18.1	57	0
Lz-airport	Lanzarote	LZ	jun	2015	summer	22.8	26.8	18.7	62	0
Lz-airport	Lanzarote	LZ	jul	2015	summer	26	30.5	21.4	63	0
Lz-airport	Lanzarote	LZ	ago	2015	summer	26.4	30.9	21.9	61	1.9
Lz-airport	Lanzarote	LZ	sep	2015	autumn	25.4	29.6	21.3	64	0.6
Lz-airport	Lanzarote	LZ	oct	2015	autumn	24	27.8	20.2	69	25
Lz-airport	Lanzarote	LZ	nov	2015	autumn	21.8	25.8	17.7	65	0.8
Lz-airport	Lanzarote	LZ	dic	2015	winter	19.7	23.5	15.9	59	3.3
Lz-airport	Lanzarote	LZ	ene	2016	winter	18.9	23.2	14.5	68	0
Lz-airport	Lanzarote	LZ	feb	2016	winter	18.3	22	14.5	66	48.2
Lz-airport	Lanzarote	LZ	mar	2016	spring	18.2	22.1	14.2	60	2.4
Lz-airport	Lanzarote	LZ	abr	2016	spring	19.6	23.8	15.4	62	0.7
Lz-airport	Lanzarote	LZ	may	2016	spring	21.2	25.3	17.1	60	2.1
Lz-airport	Lanzarote	LZ	jun	2016	summer	23.7	28.2	19.2	60	0
Lz-airport	Lanzarote	LZ	jul	2016	summer	25.2	29.5	20.7	62	0
Lz-airport	Lanzarote	LZ	ago	2016	summer	26.7	31.6	21.9	61	0
Lz-airport	Lanzarote	LZ	sep	2016	autumn	24.9	29.2	20.6	63	0
Lz-airport	Lanzarote	LZ	oct	2016	autumn	23.6	27.6	19.6	67	40.2
Lz-airport	Lanzarote	LZ	nov	2016	autumn	20.6	24.3	16.8	67	25.6
Lz-airport	Lanzarote	LZ	dic	2016	winter	19.1	22.3	15.9	64	8.6
Lz-airport	Lanzarote	LZ	ene	2017	winter	17.5	21.2	13.6	60	2.6
Lz-airport	Lanzarote	LZ	feb	2017	winter	18	22.2	13.8	65	21.3
Lz-airport	Lanzarote	LZ	mar	2017	spring	19.8	24.4	15.2	56	9.6
Lz-airport	Lanzarote	LZ	abr	2017	spring	21.4	25.7	17	61	0
Lz-airport	Lanzarote	LZ	may	2017	spring	22.6	26.7	18.4	62	0
Lz-airport	Lanzarote	LZ	jun	2017	summer	24.3	28.5	20	62	0.4
Lz-airport	Lanzarote	LZ	jul	2017	summer	25	29.3	20.6	63	0
Lz-airport	Lanzarote	LZ	ago	2017	summer	26.7	31.7	21.6	65	0
Lz-airport	Lanzarote	LZ	sep	2017	autumn	25	29.2	20.7	66	1.5
Lz-airport	Lanzarote	LZ	oct	2017	autumn	24.2	28.8	19.5	64	0.2
Lz-airport	Lanzarote	LZ	nov	2017	autumn	21.2	25.1	17.3	63	4
Lz-airport	Lanzarote	LZ	dic	2017	winter	18	21.7	14.3	63	9.9
Lz-airport	Lanzarote	LZ	ene	2018	winter	17.1	20.8	13.2	68	32.6
Lz-airport	Lanzarote	LZ	feb	2018	winter	16.5	20.1	12.7	69	44.7
Lz-airport	Lanzarote	LZ	mar	2018	spring	19.4	23.4	15.3	64	1
Lz-airport	Lanzarote	LZ	abr	2018	spring	19.3	23.5	15.1	62	6
Lz-airport	Lanzarote	LZ	may	2018	spring	20.1	23.9	16.1	61	0.2
Lz-airport	Lanzarote	LZ	jun	2018	summer	21.9	25.6	18.1	64	0.2
Lz-airport	Lanzarote	LZ	jul	2018	summer	24.1	28.4	19.8	64	0
Lz-airport	Lanzarote	LZ	ago	2018	summer	25.5	29.7	21.2	66	3.4
Lz-airport	Lanzarote	LZ	sep	2018	autumn	25.3	29.4	21.1	68	0.7
Lz-airport	Lanzarote	LZ	oct	2018	autumn	23.2	27	19.3	73	38.6
Lz-airport	Lanzarote	LZ	nov	2018	autumn	19.8	23.6	16	69	15.6
Lz-airport	Lanzarote	LZ	dic	2018	winter	18.4	22.5	14.3	67	0
Lz-airport	Lanzarote	LZ	ene	2019	winter	17	20.6	13.3	64	4
Lz-airport	Lanzarote	LZ	feb	2019	winter	17.7	22	13.3	62	4.6
Lz-airport	Lanzarote	LZ	mar	2019	spring	18.7	23.1	14.3	67	19
Lz-airport	Lanzarote	LZ	abr	2019	spring	19.6	23.8	15.4	64	2.1
Lz-airport	Lanzarote	LZ	may	2019	spring	21.7	25.9	17.4	65	0.9
Lz-airport	Lanzarote	LZ	jun	2019	summer	22.9	27.2	18.6	63	0.1
Lz-airport	Lanzarote	LZ	jul	2019	summer	24.2	28.2	20.2	65	0.2
Lz-airport	Lanzarote	LZ	ago	2019	summer	25.7	30.4	21.1	67	0
Lz-airport	Lanzarote	LZ	sep	2019	autumn	24.8	29.3	20.3	69	0.6
Lz-airport	Lanzarote	LZ	oct	2019	autumn	23.4	27.8	18.9	69	1.8
Lz-airport	Lanzarote	LZ	nov	2019	autumn	21.2	25.1	17.4	68	4.7
Lz-airport	Lanzarote	LZ	dic	2019	winter	18.9	22.7	15.1	67	14.3
Lz-airport	Lanzarote	LZ	ene	2020	winter	17.3	21.4	13.2	59	0.5
Lz-airport	Lanzarote	LZ	feb	2020	winter	19.9	24.4	15.3	58	0
Lz-airport	Lanzarote	LZ	mar	2020	spring	19	23.4	14.6	65	11.7
Lz-airport	Lanzarote	LZ	abr	2020	spring	20.5	24.8	16.1	65	14.1
Lz-airport	Lanzarote	LZ	may	2020	spring	22.4	27.1	17.7	64	0
Lz-airport	Lanzarote	LZ	jun	2020	summer	23.8	27.7	19.8	65	0.3
Lz-airport	Lanzarote	LZ	jul	2020	summer	25.6	30.1	21	67	0
Lz-airport	Lanzarote	LZ	ago	2020	summer	26.2	30.7	21.8	65	0
Lz-airport	Lanzarote	LZ	sep	2020	autumn	26.1	30.8	21.4	67	0
Lz-airport	Lanzarote	LZ	oct	2020	autumn	23.4	27.6	19.1	65	3.1
Lz-airport	Lanzarote	LZ	nov	2020	autumn	20.8	24.9	16.7	70	32.7
Lz-airport	Lanzarote	LZ	dic	2020	winter	18.7	22.3	15	70	4.8
Lz-airport	Lanzarote	LZ	ene	2021	winter	17.5	21.4	13.6	71	47.6
Lz-airport	Lanzarote	LZ	feb	2021	winter	17.6	21.8	13.4	68	19.9
Lz-airport	Lanzarote	LZ	mar	2021	spring	19	23.3	14.6	64	3.2
Lz-airport	Lanzarote	LZ	abr	2021	spring	20.6	25.2	16	64	1.4
Lz-airport	Lanzarote	LZ	may	2021	spring	21.8	26.1	17.4	61	0
Lz-airport	Lanzarote	LZ	jun	2021	summer	23.1	27.7	18.5	58	0.1
LZ-01	Lanzarote	LZ	ene	2015	winter
LZ-01	Lanzarote	LZ	feb	2015	winter
LZ-01	Lanzarote	LZ	mar	2015	spring
LZ-01	Lanzarote	LZ	abr	2015	spring	17.9125	25.2	13.1	70.8251	0.3
LZ-01	Lanzarote	LZ	may	2015	spring	20.7471	40.5	15.3	69.4767	0
LZ-01	Lanzarote	LZ	jun	2015	summer	20.625	27.9	16.3	75.2046	1.2
LZ-01	Lanzarote	LZ	jul	2015	summer	23.2218	35.7	18.3	77.8916	0
LZ-01	Lanzarote	LZ	ago	2015	summer	24.1353	34.3	19.5	72.4258	2.9
LZ-01	Lanzarote	LZ	sep	2015	autumn	23.9144	33.4	18.9	71.9308	0.5
LZ-01	Lanzarote	LZ	oct	2015	autumn	22.8377	36.3	17.1	75.8854	63.6
LZ-01	Lanzarote	LZ	nov	2015	autumn	20.8508	28.2	16.1	72.0189	1.3
LZ-01	Lanzarote	LZ	dic	2015	winter	19.457	25.2	12.9	62.3186	3.4
LZ-01	Lanzarote	LZ	ene	2016	winter	18.5101	26.8	14.4	73.6921	1.2
LZ-01	Lanzarote	LZ	feb	2016	winter	17.2614	26.6	10.2	72.4997	41.2
LZ-01	Lanzarote	LZ	mar	2016	spring	16.9979	24.4	12.2	68.9682	4.4
LZ-01	Lanzarote	LZ	abr	2016	spring	18.2932	26	13.7	71.2466	5.3
LZ-01	Lanzarote	LZ	may	2016	spring	19.4655	26.4	15	71.4806	0.6
LZ-01	Lanzarote	LZ	jun	2016	summer	21.382	33.1	16.6	75.8324	1.3
LZ-01	Lanzarote	LZ	jul	2016	summer	22.518	33.2	16.9	78.1115	0
LZ-01	Lanzarote	LZ	ago	2016	summer	24.2853	37.7	20.3	74.9205	0.1
LZ-01	Lanzarote	LZ	sep	2016	autumn	23.1651	29.6	18.1	73.9993	2.4
LZ-01	Lanzarote	LZ	oct	2016	autumn	22.5638	32.9	16.8	75.9209	51.7
LZ-01	Lanzarote	LZ	nov	2016	autumn	19.8153	29.4	13.6	75.9895	27
LZ-01	Lanzarote	LZ	dic	2016	winter	18.7075	25.3	13.7	70.1442	10.8
LZ-01	Lanzarote	LZ	ene	2017	winter	16.9953	22.7	11.4	66.4198	1
LZ-01	Lanzarote	LZ	feb	2017	winter	17.358	27.5	12.3	73.0353	15.9
LZ-01	Lanzarote	LZ	mar	2017	spring	18.7211	31.8	11.4	65.2735	3.2
LZ-01	Lanzarote	LZ	abr	2017	spring	20.3065	37.8	14.5	70.0667	1
LZ-01	Lanzarote	LZ	may	2017	spring	21.156	27.6	15.5	72.0356	0.3
LZ-01	Lanzarote	LZ	jun	2017	summer	22.4072	34.8	16.8	72.8565	0.7
LZ-01	Lanzarote	LZ	jul	2017	summer	22.8761	35.4	18.3	75.3161	0
LZ-01	Lanzarote	LZ	ago	2017	summer	24.4797	38.5	19	75.1477	0
LZ-01	Lanzarote	LZ	sep	2017	autumn	23.7325	33.6	18.7		0
LZ-01	Lanzarote	LZ	oct	2017	autumn	24.2231	36.7	17.4	23.4984	0.1
LZ-01	Lanzarote	LZ	nov	2017	autumn	21.0791	27.2	16.1	60.7192	0
LZ-01	Lanzarote	LZ	dic	2017	winter	17.6503	24.7	12.9	63.751	3.7
LZ-01	Lanzarote	LZ	ene	2018	winter	16.5853	25.8	10	70.1316	21.7
LZ-01	Lanzarote	LZ	feb	2018	winter	15.8234	23.8	9.8	70.5694	44.2
LZ-01	Lanzarote	LZ	mar	2018	spring	18.3543	29.7	13.3	69.362	3.1
LZ-01	Lanzarote	LZ	abr	2018	spring	17.755	27.1	13.2	68.9777	7.5
LZ-01	Lanzarote	LZ	may	2018	spring	18.4185	24.2	13.6	68.1904	0.7
LZ-01	Lanzarote	LZ	jun	2018	summer	20.3736	27.3	16.2	71.4763	0.5
LZ-01	Lanzarote	LZ	jul	2018	summer	22.278	31.9	18	72.0745	0
LZ-01	Lanzarote	LZ	ago	2018	summer	23.3732	33.2	19.1	73.5144	3.7
LZ-01	Lanzarote	LZ	sep	2018	autumn	23.7597	33.2	19	73.1434	0.8
LZ-01	Lanzarote	LZ	oct	2018	autumn	22.2772	30.5	16.1	74.9297	46.6
LZ-01	Lanzarote	LZ	nov	2018	autumn	19.2847	25.2	14.6	71.6113	18.7
LZ-01	Lanzarote	LZ	dic	2018	winter	19.0553	25.3	14.5	64.0475	0
LZ-01	Lanzarote	LZ	ene	2019	winter	16.7628	21.9	12.8	65.8233	3.7
LZ-01	Lanzarote	LZ	feb	2019	winter	18.1718	27.5	12.3	58.4197	6.4
LZ-01	Lanzarote	LZ	mar	2019	spring	17.87	25.6	13.8	69.6374	1
LZ-01	Lanzarote	LZ	abr	2019	spring	18.3753	26.1	14	68.8524	0.4
LZ-01	Lanzarote	LZ	may	2019	spring	19.7956	28.6	15.3	72.6484	0.1
LZ-01	Lanzarote	LZ	jun	2019	summer	21.3739	33.1	16.3	69.5237	0.7
LZ-01	Lanzarote	LZ	jul	2019	summer	22.3198	27.9	18.3	72.3952	0.4
LZ-01	Lanzarote	LZ	ago	2019	summer	23.4594	33.5	19.6	73.9931	0.1
LZ-01	Lanzarote	LZ	sep	2019	autumn	23.2027	31.4	19.2	72.9955	0.5
LZ-01	Lanzarote	LZ	oct	2019	autumn	22.6217	32.3	16.5	68.7699	2.1
LZ-01	Lanzarote	LZ	nov	2019	autumn	20.1599	30.9	14.5	71.0412	1.8
LZ-01	Lanzarote	LZ	dic	2019	winter	18.6464	24.8	14.3	67.6915	15.8
LZ-01	Lanzarote	LZ	ene	2020	winter	17.3357	26.5	12.2	60.102	0.8
LZ-01	Lanzarote	LZ	feb	2020	winter	19.5846	28	14.1	59.7915	0
LZ-01	Lanzarote	LZ	mar	2020	spring	18.1476	28.9	11.9	68.7735	12.1
LZ-01	Lanzarote	LZ	abr	2020	spring	19.1943	25.7	14.4	69.9452	15.5
LZ-01	Lanzarote	LZ	may	2020	spring	20.7672	31.2	15.3	71.8672	0.6
LZ-01	Lanzarote	LZ	jun	2020	summer	22.6985	30.3	17.8	69.3929	0.2
LZ-01	Lanzarote	LZ	jul	2020	summer	23.1418	32.7	19.6	76.6649	0
LZ-01	Lanzarote	LZ	ago	2020	summer	24.3372	30.8	20	72.1784	1.5
LZ-01	Lanzarote	LZ	sep	2020	autumn	24.2045	33.5	20.2	72.5689	0.3
LZ-01	Lanzarote	LZ	oct	2020	autumn	22.476	31.9	17	68.1448	1.3
LZ-01	Lanzarote	LZ	nov	2020	autumn	21.6141	31.4	13	63.1057	57
LZ-01	Lanzarote	LZ	dic	2020	winter	18.4107	24	14.4	72.1618	8.5
LZ-01	Lanzarote	LZ	ene	2021	winter	17.5002	28	12.4	71.6265	36.3
LZ-01	Lanzarote	LZ	feb	2021	winter	17.4527	25.3	11.2	70.3018	27.2
LZ-01	Lanzarote	LZ	mar	2021	spring	18.3302	29	13.6	66.7643	4
LZ-01	Lanzarote	LZ	abr	2021	spring	19.5435	27.4	15	70.3004	0.8
GC102	Lanzarote	LZ	ene	2015	winter	14.372	21.88	9.45	73.04	15.6
GC102	Lanzarote	LZ	feb	2015	winter	13.71	19.5	8.14	78.165	14.4
GC102	Lanzarote	LZ	mar	2015	spring	15.423	26.23	9.55	74.643	26.6
GC102	Lanzarote	LZ	abr	2015	spring	16.746	24.14	11.36	74.91	0.2
GC102	Lanzarote	LZ	may	2015	spring	19.535	39.89	12.47	71.356	1.2
GC102	Lanzarote	LZ	jun	2015	summer	19.031	27.69	13.21	79.368	2
GC102	Lanzarote	LZ	jul	2015	summer	21.925	34.21	16.91	80.651	0.6
GC102	Lanzarote	LZ	ago	2015	summer	22.495	33.06	16.74	77.758	7
GC102	Lanzarote	LZ	sep	2015	autumn	22.738	33.27	15.45	75.575	2
GC102	Lanzarote	LZ	oct	2015	autumn	21.519	35.26	13.74	79.059	134.4
GC102	Lanzarote	LZ	nov	2015	autumn	19.296	28.3	13.37	74.374	7.2
GC102	Lanzarote	LZ	dic	2015	winter	18.131	25.09	11.39	59.086	4.2
GC102	Lanzarote	LZ	ene	2016	winter	17.257	26.53	10.74	75.831	7.4
GC102	Lanzarote	LZ	feb	2016	winter	15.63	25.76	8.51	77.146	50
GC102	Lanzarote	LZ	mar	2016	spring	15.871	24.72	9.53	72.402	11.8
GC102	Lanzarote	LZ	abr	2016	spring	18.378	28.67	10.95	77.112	24
GC102	Lanzarote	LZ	may	2016	spring	19.356	27.73	14.41	77.436	2.8
GC102	Lanzarote	LZ	jun	2016	summer	20.773	34.02	16.72	80.011	8.8
GC102	Lanzarote	LZ	jul	2016	summer	21.778	34.83	17.73	80.782	0.6
GC102	Lanzarote	LZ	ago	2016	summer	23.01	37.26	18.64	77.645	0.2
GC102	Lanzarote	LZ	sep	2016	autumn	21.723	30.5	16.47	78.963	0.4
GC102	Lanzarote	LZ	oct	2016	autumn	21.746	31.75	16.67	79.816	62.2
GC102	Lanzarote	LZ	nov	2016	autumn	19.053	29.97	11.42	77.878	32.8
GC102	Lanzarote	LZ	dic	2016	winter	17.763	25.19	11.22	73.446	24.6
GC102	Lanzarote	LZ	ene	2017	winter	17.086	26.48	10	68.538	4.8
GC102	Lanzarote	LZ	feb	2017	winter	17.893	30.58	9.57	80.01	39.2
GC102	Lanzarote	LZ	mar	2017	spring	19.023	33.13	7.176	70.755	13.6
GC102	Lanzarote	LZ	abr	2017	spring	21.505	36.61	11.93	71.539	1.4
GC102	Lanzarote	LZ	may	2017	spring	19.368	25.32	10.85	78.911	1.4
GC102	Lanzarote	LZ	jun	2017	summer	20.655	35.48	15.39	77.231	0.4
GC102	Lanzarote	LZ	jul	2017	summer	21.375	34.75	17.01	78.928	0.2
GC102	Lanzarote	LZ	ago	2017	summer	23.404	41.59	17.32	77.486	1.6
GC102	Lanzarote	LZ	sep	2017	autumn	22.614	33.31	16.08	78.847	1.6
GC102	Lanzarote	LZ	oct	2017	autumn	23.353	35.67	13.85	66.566	3
GC102	Lanzarote	LZ	nov	2017	autumn	19.701	28.45	11.64	62.465	2.4
GC102	Lanzarote	LZ	dic	2017	winter	15.385	24.18	8.81	71.546	25.8
GC102	Lanzarote	LZ	ene	2018	winter	14.639	25.99	7.458	77.698	38.8
GC102	Lanzarote	LZ	feb	2018	winter	14.072	23.53	7.381	76.934	70.2
GC102	Lanzarote	LZ	mar	2018	spring	17.368	29.31	12.17	76.357	13.2
GC102	Lanzarote	LZ	abr	2018	spring	17.531	28.65	13.28	78.045	22
GC102	Lanzarote	LZ	may	2018	spring	18.66	27.85	13.14	77.907	1.8
GC102	Lanzarote	LZ	jun	2018	summer	20.846	31.75	17.22	80.674	2
GC102	Lanzarote	LZ	jul	2018	summer	22.621	30.65	17.66	82.565	0.2
GC102	Lanzarote	LZ	ago	2018	summer	23.759	36.17	19.57	82.345	3
GC102	Lanzarote	LZ	sep	2018	autumn	24.205	38.98	18.33	82.08	2
GC102	Lanzarote	LZ	oct	2018	autumn	20.432	29.35	13.18	79.534	75
GC102	Lanzarote	LZ	nov	2018	autumn	17.163	24.24	11.17	78.555	52.4
GC102	Lanzarote	LZ	dic	2018	winter	17.427	25.35	10.9	65.651	2.2
GC102	Lanzarote	LZ	ene	2019	winter	14.887	21.51	8.98	73.276	14
GC102	Lanzarote	LZ	feb	2019	winter	16.759	27.02	8.41	57.715	7.8
GC102	Lanzarote	LZ	mar	2019	spring	16.275	26.95	10.63	76.786	19.6
GC102	Lanzarote	LZ	abr	2019	spring	16.986	26.08	11.64	75.828	11.4
GC102	Lanzarote	LZ	may	2019	spring	19.04	29.95	12.91	79.117	1.6
GC102	Lanzarote	LZ	jun	2019	summer	20.622	31.93	14.66	74.251	3
GC102	Lanzarote	LZ	jul	2019	summer	21.394	27.68	17.63	80.321	3.8
GC102	Lanzarote	LZ	ago	2019	summer	23.023	33.41	19.18	81.03	0.4
GC102	Lanzarote	LZ	sep	2019	autumn	22.967	32.07	17.56	80.936	3
GC102	Lanzarote	LZ	oct	2019	autumn	22.788	33.26	14.63	76.183	6.6
GC102	Lanzarote	LZ	nov	2019	autumn	20.032	36.73	12.92	79.132	9.8
GC102	Lanzarote	LZ	dic	2019	winter	18.951	29.71	11.81	81.317	31.4
